# Supplementary material for: Synthesis and Preliminary Evaluation of an ASGPr-Targeted Polycationic β-Cyclodextrin Carrier for Nucleosides and Nucleotides
Source: MDPI journal article supplement (doi:10.3390/pharmaceutics16030323), 2024-02-26
Supplement: s1 [file s1]

Supplementary Material

# Synthesis and Preliminary Evaluation of an ASGPr-targeted Polycationic $\beta$ -cyclodextrin Carrier for Nucleosides and Nucleotides

Jang-Ha (John) Ryu,<sup>1</sup> Weizhong Zheng,<sup>2</sup> Xiao-Hong Yang,<sup>3</sup> Hassan Elsaïdi,<sup>4</sup> Jim Diakur,<sup>5†</sup> Leonard I. Wiebe<sup>\*,†</sup>

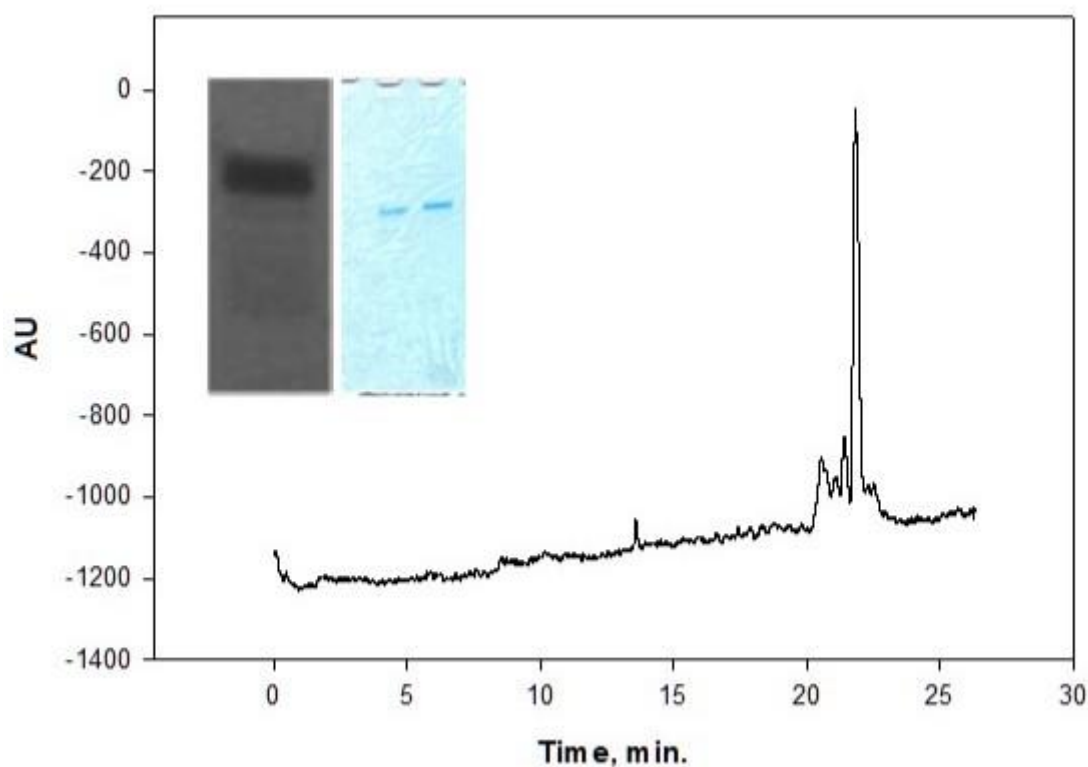

Figure S1. p-araAMP gels & CE.
